# Supplementary material
Source: PubMed Central journal article supplement (PMC3667479)
Supplement: NIHMS52134-supplement-01.pdf [file NIHMS52134-supplement-01.pdf]

# Supporting Information for

## Sintering Rate and Mechanism of TiO<sub>2</sub> Nanoparticles by Molecular Dynamics

B. Buesser, A. Gröhn and S.E. Pratsinis\*  
Particle Technology Laboratory, Institute of Process Engineering  
Department of Mechanical and Process Engineering  
ETH Zurich, 8092 Zürich, Switzerland

**Validation.** Figure S11 shows the calculated total energy of equilibrated rutile TiO<sub>2</sub> nanoparticles (open symbols) with diameter  $d_{p,0} = 2$  (triangles), 2.8 (circles) and 3 nm (squares) as function of temperature along with the simulations of Collins *et al.*<sup>1</sup> for  $d = 2.8$  nm (filled circles). The energy of the  $d_{p,0} = 2.8$  nm particle calculated here is in agreement with Collins *et al.*<sup>1</sup>. Decreasing the particle size to  $d_{p,0} = 2$  nm leads to a small step in the total energy. This marks the transition temperature between solid- and liquid-like particles. The small size of this step indicates that the transition between liquid and solid is small explaining the liquid-like behavior of such particles (Figure 4). Increasing the particle size shifts this step to higher temperatures (2300 K for 2.8 nm and 2700 K for 3 nm), higher than the melting temperature of bulk TiO<sub>2</sub> in agreement with Koparde and Cummings<sup>2</sup>.

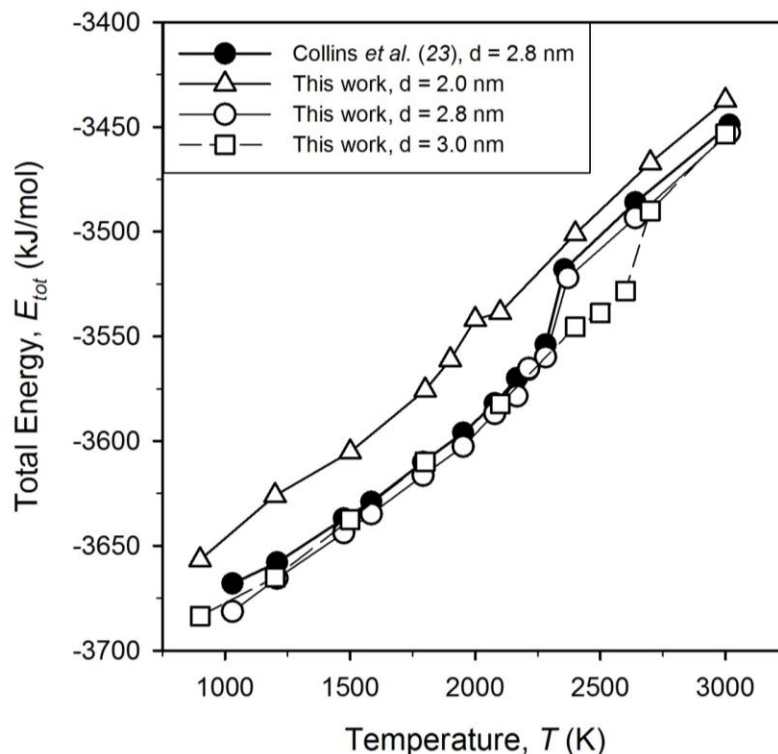

**Figure SII** The total energy of equilibrated rutile  $\text{TiO}_2$  nanoparticles with initial diameter  $d_{p,0} = 2.8$  nm (1245 ions) of Collins *et al.*<sup>1</sup> (filled circles) compared with this work (open symbols) as a function of temperature.

**Different Initial Particle Orientations.** Figure SI2 shows that different initial particle orientations (right particle is rotated by  $0^\circ$  (black),  $90^\circ$  (red),  $180^\circ$  (pink) and  $270^\circ$  (green)) lead to slightly different evolution of surface area during all stages of sintering, but all are close to each other ( $d_{p,0} = 3$  nm and  $T = 1800$  K). The evolution for  $0^\circ$  (red line) deviates slightly more than the rest but it also converges with the others at the end. The average of these four simulations is shown here and in Figure 4 (dash-dot line). The bond order parameters  $Q_4$ ,  $W_4$  and  $W_6$  for oxygen and titanium ions in the present nanoparticles were calculated following Steinhart *et al.*<sup>3</sup> with the source code of Wang *et al.*<sup>4</sup>. It was found that the final coalesced  $\text{TiO}_2$  nanoparticle remained in the rutile phase as the initial ones in agreement with Koparde and Cummings<sup>5</sup>.

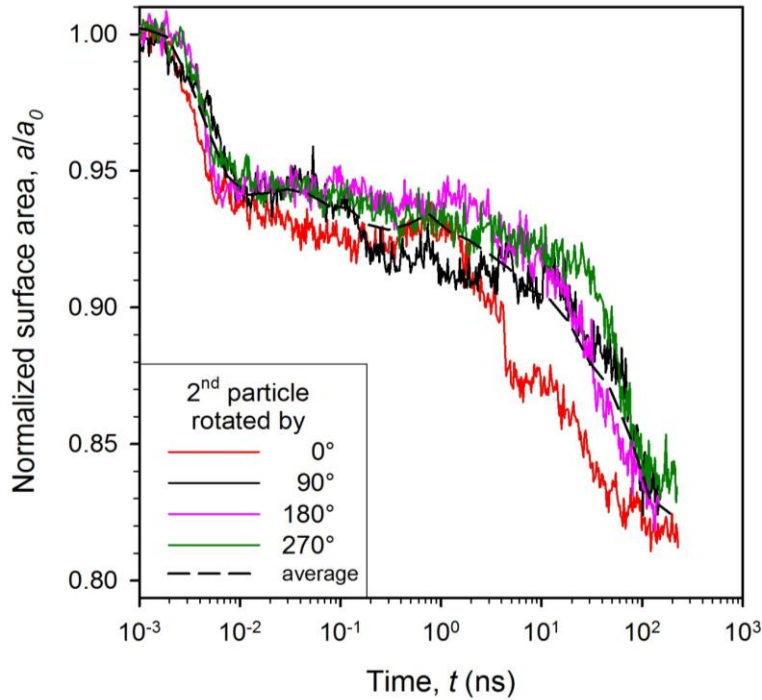

**Figure SI2** Evolution of normalized surface area for two rutile  $\text{TiO}_2$  particles undergoing sintering with  $d_{p,0} = 3$  nm at conserved  $T = 1800\text{K}$  where the right particle is rotated by  $0^\circ$  (red),  $90^\circ$  (black),  $180^\circ$  (pink) and  $270^\circ$  (green) along with their average (dashed line).

**Influence of temperature on Sintering.** Figure SI3 shows the average of four evolutions of normalized surface area  $a/a_0$  for two  $\text{TiO}_2$  nanoparticles undergoing sintering with initial diameter  $d_{p,0} = 2.5$  nm as in Fig. 4 at  $T = 1500$  (dotted line),  $1600$  (dash-dot),  $1700$  (dashed) and  $1800$  K (solid). The horizontal line defines again the excess surface area reduction by 67 % as discussed in the paper. Increasing the temperature leads to shorter characteristic sintering times and therefore faster sintering in agreement with experiments<sup>6</sup>. Note that the initial stage of sintering (adhesion) does not depend on temperature so all evolutions are clustered together because adhesion depends mostly on particle diameter for solid particles.

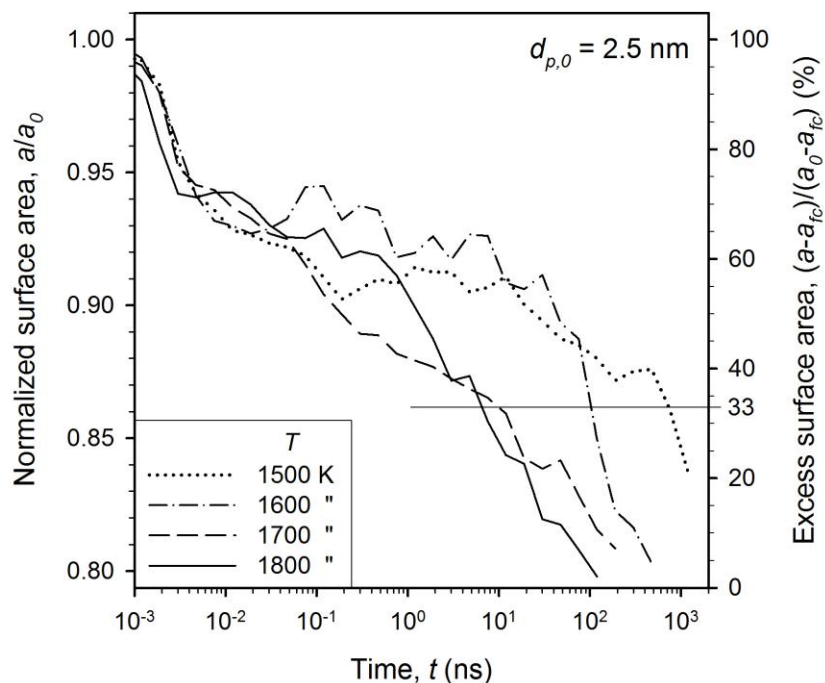

**Figure SI3** Evolution of the normalized surface area of two  $\text{TiO}_2$  nanoparticles undergoing sintering with initial diameter  $d_{p,0} = 2.5$  nm at conserved temperatures  $T = 1500, 1600, 1700$  and  $1800$  K. The thin horizontal line where the excess surface area (right axis) has decreased by 67% defines the MD-obtained characteristic sintering times  $\tau$  in Fig. 6 (circles).

## References

- (1) Collins, D. R.; Smith, W.; Harrison, N. M.; Forester, T. R. *J. Mater. Chem.* **1996**, *6*, 1385.
- (2) Koparde, V. N.; Cummings, P. T. *J. Nanopart. Res.* **2008**, *10*, 1169.
- (3) Steinhardt, P. J.; Nelson, D. R.; Ronchetti, M. *Phys. Rev. B* **1983**, *28*, 784.
- (4) Wang, Y.; Teitel, S.; Dellago, C. *J. Chem. Phys.* **2005**, *122*, 214722.
- (5) Koparde, V. N.; Cummings, P. T. *ACS Nano* **2008**, *2*, 1620.
- (6) Seto, T.; Shimada, M.; Okuyama, K. *Aerosol Sci. Technol.* **1995**, *23*, 183.
